1           Large scale genomic analysis of 3067 SARS-  
2           CoV-2 genomes reveals a clonal geo-distribution  
3           and a rich genetic variations of hotspots  
4           mutations

5           Meriem LAAMARTI<sup>¶</sup>, Tarek ALOUANE<sup>¶</sup>, Souad KARTTI<sup>1</sup>, M.W. CHEMAO-  
6           ELFIHRI<sup>1</sup>, Mohammed HAKMI<sup>1</sup>, Abdelomunim ESSABBAR<sup>1</sup>, Mohamed LAAMARTI<sup>1</sup>,  
7           Haitam HLALI<sup>1</sup>, Loubna ALLAM<sup>1</sup>, Naima EL HAFIDI<sup>1</sup>, Rachid EL JAUDI<sup>1</sup>, Imane  
8           ALLALI<sup>2</sup>, Nabila MARCHOUDI<sup>3</sup>, Jamal FEKKAK<sup>3</sup>, Houda BENRAHMA<sup>4</sup>, Chakib  
9           NEJJARI<sup>5</sup>, Saaid AMZAZI<sup>5</sup>, Lahcen BELYAMANI<sup>6</sup> and Azeddine IBRAHIMI<sup>\*</sup>

10  
11  
12  
13           <sup>1</sup> Medical Biotechnology Laboratory (MedBiotech), Bioinova Research Center, Rabat  
14           Medical & Pharmacy School, Mohammed Vth University in Rabat, Morocco

15           <sup>2</sup> Laboratory of Human Pathologies Biology, Department of Biology, Faculty of Sciences,  
16           and Genomic Center of Human Pathologies, Faculty of Medicine and Pharmacy,  
17           Mohammed V University in Rabat, Morocco.

18           <sup>3</sup> Anoual Laboratory of Radio-Immuno Analysis, Casablanca, Morocco.

19           <sup>4</sup> Faculty of Medicine, Mohammed VI University of Health Sciences (UM6SS),  
20           Casablanca, Morocco.

21           <sup>5</sup> International School of Public Health, Mohammed VI University of Health Sciences  
22           (UM6SS), Casablanca, Morocco.

23           <sup>6</sup> Emergency Department, Military Hospital Mohammed V, Rabat Medical & Pharmacy  
24           School, Mohammed Vth University in Rabat, Morocco.

25  
26  
27           \* **Corresponding author:** [a.ibrahimi@um5s.net.ma](mailto:a.ibrahimi@um5s.net.ma)

28  
29           ¶ **These authors contributed equally to this work**

30  
31  
32

33 **Abstract**

34 In late December 2019, an emerging viral infection COVID-19 was identified in Wuhan,  
35 China, and became a global pandemic. Characterization of the genetic variants of SARS-  
36 CoV-2 is crucial in following and evaluating its spread across countries. In this study, we  
37 collected and analyzed 3,067 SARS-CoV-2 genomes isolated from 55 countries during the  
38 first three months after the onset of this virus. Using comparative genomics analysis, we  
39 traced the profiles of the whole-genome mutations and compared the frequency of each  
40 mutation in the studied population. The accumulation of mutations during the epidemic  
41 period with their geographic locations was also monitored. The results showed 782 variant  
42 sites, of which 512 (65.47%) had a non-synonymous effect. Frequencies of mutated alleles  
43 revealed the presence of 38 recurrent non-synonymous mutations, including ten hotspot  
44 mutations with a prevalence higher than 0.10 in this population and distributed in six  
45 SARS-CoV-2 genes. The distribution of these recurrent mutations on the world map  
46 revealed certain genotypes specific to the geographic location. We also found co-occurring  
47 mutations resulting in the presence of several haplotypes. Moreover, evolution over time  
48 has shown a mechanism of mutation co-accumulation which might affect the severity and  
49 spread of the SARS-CoV-2.

50 On the other hand, analysis of the selective pressure revealed the presence of negatively  
51 selected residues that could be taken into consideration as therapeutic targets

52 We have also created an inclusive unified database (<http://genoma.ma/covid-19/>) that lists  
53 all of the genetic variants of the SARS-CoV-2 genomes found in this study with  
54 phylogeographic analysis around the world.

55

56

57 **Keywords:** SARS-CoV-2, Hotspots mutations, Dissemination, Genomic analysis.

58

59

60

61

62

63

## 64 **Introduction**

65 The recent emergence of the novel, human pathogen Severe Acute Respiratory Syndrome  
66 Coronavirus 2 (SARS-CoV-2) in China with its rapid international spread poses a global  
67 health emergency. On March 11, 2020, the World Health Organization (WHO) publicly  
68 announced the SARS-CoV-2 epidemic as a global pandemic. As of March 23, 2020, the  
69 COVID-19 pandemic had affected more than 190 countries and territories, with more than  
70 464,142 confirmed cases and 21,100 deaths (1).

71 The new SARS-CoV-2 coronavirus is an enveloped positive-sense single-stranded RNA  
72 virus belonging to a large family named coronavirus which have been classified under  
73 three groups two of them are responsible for infections in mammals (2), such us: bat SARS-  
74 CoV-like; Middle East respiratory syndrome coronavirus (MERS-CoV). Many recent  
75 studies have suggested that SARS-CoV-2 was diverged from bat SARS-CoV-like (3-4).

76 The size of the SARS-CoV2 genome is approximately 30 kb and its genomic structure has  
77 followed the characteristics of known genes of Coronavirus; the polyprotein orf1ab also  
78 known as the polyprotein replicase covers more than 2 thirds of the total genome size and  
79 structural proteins, including spike protein, membrane protein, envelope protein and  
80 nucleocapsid protein. In addition ere are also six ORFs (ORF3a, ORF6, ORF7a, ORF7b,  
81 ORF8 and ORF10) are predicted as hypothetical proteins with no associated function (5).

82 Characterization of viral mutations can provide valuable information for assessing the  
83 mechanisms linked to pathogenesis, immune evasion and viral drug resistance. In addition,  
84 viral mutation studies can be crucial for the design of new vaccines, antiviral drugs and  
85 diagnostic tests. A previous study (6) based on an analysis of 103 genomes of SARS-CoV-  
86 2 indicates that this virus has evolved into two main types. Type L being more widespread  
87 than type S, and type S representing the ancestral version. In addition, another study (7)  
88 conducted on 32 genomes of strains sampled from China, Thailand and the United States  
89 between December 24, 2019 and January 23, 2020 suggested increasing tree-like signals  
90 from 0 to 8.2%, 18.2% and 25, 4% over time, which may indicate an increase in the genetic  
91 diversity of SARS-CoV-2 in human hosts.

92 Therefore, the analysis of mutations and monitoring of the evolutionary capacity of SARS-  
93 CoV-2 over time-based on a large population is necessary. In this study, we characterized  
94 the genetic variants in 3067 SARS-CoV-2 genomes for a detailed understanding of their

95 genetic diversity and to monitor the accumulation of mutations over time with particular  
96 focus on the geographic distribution of recurrent mutations. On the other hand, we  
97 established selective pressure analysis to predict negatively selected residues which could  
98 be useful for the design of therapeutic targets. We have also created a database to share,  
99 exploit and research knowledge of genetic variants to facilitate comparison for the COVID-  
100 19 scientific community.

## 101 **Materials and Methods**

### 102 **Data collection and Variant calling analysis**

103 3067 sequences of SARS-CoV-2 were collected from the GISAID EpiCovTM (update: 02-  
104 04-2020) and NCBI (update: 20-03-2020) databases. Only complete genomes were used  
105 in this study (**Additional file 1: Table S1**). Genomes were mapped to the reference  
106 sequence Wuhan-Hu-1/2019 (NC\_045512) using Minimap v2.12-r847-dirty (8). The BAM  
107 files were sorted by SAMtools sort (9), then used to call the genetic variants in variant call  
108 format (VCF) by SAMtools mpileup (9) and bcftools v1.8 (9). The final call set of the 3067  
109 genomes, was annotated and their impact was predicted using SnpEff v 4.3t (10). First, the  
110 SnpEff databases were built locally using annotations of the reference genome  
111 NC\_045512.2 obtained in GFF format from the NCBI database. Then, the SnpEff database  
112 was used to annotate SNPs and InDels with putative functional effects according to the  
113 categories defined in the SnpEff manual  
114 ([http://snpeff.sourceforge.net/SnpEff\\_manual.html](http://snpeff.sourceforge.net/SnpEff_manual.html)).

### 115 **Phylogentic analysis and geodistribution**

116 The downloaded full-length genome sequences of coronaviruses isolated from different  
117 hosts from public databases were subjected to multiple sequence alignments using Muscle  
118 v 3.8 (11). Maximum-likelihood phylogenetic trees with 1000 bootstrap replicates were  
119 constructed using RaxML v 8.2.12 (39)). Heatmap for correlation analysis was performed  
120 on countries and hotspots mutations using CustVis with default settings rows scaling =  
121 variance scaling, PCA method = SVD with imputation, clustering distance for rows =  
122 correlation clustering, the method for rows = average, tree ordering for rows = tightest  
123 cluster first (12).

124

## 125 **Selective pressure and modelling**

126 We used Hyphy v2.5.8 (13) to estimate synonymous and non-synonymous ratio  $dN / dS$   
127 ( $\omega$ ). Two datasets of 191 and 433 for orf1ab and genes respectively were retrieved from  
128 Genbank (<http://www.ncbi.nlm.nih.gov/genbank/>). After deletion of duplicated and  
129 cleaning the sequences, only 91 and 39 for orf1ab and spike proteins, respectively, were  
130 used for the analysis (**Additional file 1: Table S2**). The selected nucleotide sequences of  
131 each dataset were aligned using Clustalw codon-by-codon and the phylogenetic tree was  
132 obtained using ML (maximum likelihood) available in MEGA X (14). For this analysis,  
133 four Hyphy's methods were used to study site-specific selection: SLAC (Single-Likelihood  
134 Ancestor Counting (15), FEL (Fixed Effects Likelihood) (15), FUBAR (Fast,  
135 Unconstrained Bayesian AppRoximation) (16) and MEME (Mixed Effects Model of  
136 Evolution) (17). For all the methods, values supplied by default were used for statistical  
137 confirmation and the overall  $\omega$  value was calculated according to ML trees under General  
138 time reversible model (GTR model). The CI- TASSER generated models ([https://zhanglab.ccmb.med.umich.edu / COVID-19 /](https://zhanglab.ccmb.med.umich.edu/COVID-19/)) of nonstructural proteins (nsp3, nsp4,  
139 nsp6, nsp12, nsp13, nsp14 and nsp16 of orf1ab were used to highlight the sites under  
140 selective pressure on the protein. On the other hand, the cryo-EM structure with PDB id  
141 6VSB was used as a model for the spike protein in its prefusion conformation. Structure  
142 visualization and image rendering were performed in PyMOL 2.3 (Schrodinger LLC).

## 144 **Pangenome construction**

145 115 proteomes of the genus *Betacoronavirus* were obtained from the NCBI database  
146 (update: 20-03-2020), of which 83 genomes belonged to the SARS-CoV-2 species and the  
147 rest distributed to other species of the same genus publicly available (**Additional file 2:**  
148 **Table S3**). These proteomes were used for the construction of pangenome at the inter-  
149 specific scale of *Betacoronavirus* and intra-genomic of SARS-CoV-2. The strategy of best  
150 reciprocal BLAST results (18) was implemented to identify all of the orthologous genes  
151 using Proteinortho v6.0b (19). Proteins with an identity above 60% and sequence coverage  
152 above 75% with an e-value threshold below  $1e-5$  were used to be considered as significant  
153 hits.

154

## 155 **Results**

### 156 **SARS-CoV-2 genomes used in this study**

157 In this study, we used 3,067 SARS-CoV2 complete genomes collected from GISAID  
158 EpiCovTM (update: 02-04-2020) and NCBI (update: 20-03-2020) databases. These strains  
159 were isolated from 55 countries (**Fig 1A**). The most represented origin was American  
160 strains with 783 (25.53%), followed by strains from England, Iceland, and China with 407  
161 (13.27%), 343 (11.18%), 329 (10.73%), respectively. The date of isolation was during the  
162 first three months after the appearance of the SARS-CoV-2 virus, from December 24, 2019,  
163 to March 25, 2020 (**Fig 1B**). Likewise, about two-thirds of these strains collected in this  
164 work were isolated during March.

### 165 **Allele frequencies revealed a diversity of genetic variants in six SARS-Cov-2 genes**

166 To study and follow the appearance and accumulation of mutations, we have traced the  
167 profiles of these mutations and compared their frequencies in the population studied.  
168 Remarkably, compared to the Wuhan-Hu-1/2019 reference sequence, a total of 782 variant  
169 sites were identified, including 512 (65.47%) non-synonymous mutations, 222 (28.38%)  
170 synonymous mutations, and four (0.51% ) deletion mutation effect. The rest (5.64%)  
171 distributed to the intergenic regions. Frequency analysis of the mutated alleles revealed the  
172 presence of 68 recurrent mutations with a prevalence greater than 0.006 (0.06% of the  
173 population), which corresponds to at least 20 / 3,067 genomes of SARS-CoV-2. Focusing  
174 on recurrent non-synonymous mutations, 38 was found and distributed in six genes with  
175 variable frequencies (**Fig 2**), of which the gene coding for replicase polyprotein (orf1ab),  
176 spike protein, membrane glycoprotein, nucleocapsid phosphoprotein, ORF3a, and ORF8.  
177 Overall, orf1ab harbored more non-synonymous mutations compared to the other five  
178 genes with 22 mutations, including three mutations located in nsp12-RNA- dependent  
179 RNA polymerase (RdRp) (M4555T, T4847I and T5020I), three in nsp13-helicase  
180 (V5661A, P5703L and M5865V), two in nsp5-main proteinase (G3278S and K3353R),  
181 two in nsp15-EndoRNAse (I6525T, Ter6668W), two in nsp3-multi domains (A876T and  
182 T1246I), one in nsp14-exonuclease (S5932F) and one in nsp4-transmembrane domain 2  
183 (F3071Y). Likewise, spike protein harbored three frequent mutations, including V483A in  
184 receptor-binding domain (RBD). The rest of the mutations were found in nucleocapsid

185 phosphoprotein (S193I, S194L, S197L, S202N, R203K and G204R), ORF3a (S193I,  
186 S194L, S197L, S202N, R203K and G204R), membrane glycoprotein (D3G and T175M)  
187 and ORF8 (V62L and L84S).

### 188 **Identification of ten hyper-variable genomic hotspot in SARS-CoV-2 genomes**

189 Interestingly, among all recurrent mutations, ten were found as hotspot mutations with a  
190 frequency greater than 0.10 in this study population (**Fig 2**). The most represented was  
191 D614G mutation at spike protein with 43.46% (n = 1.333) of the genomes, the second was  
192 L84S (at ORF8) found in 23.21% (n = 712). Thus, the gene coding for orf1ab had four  
193 mutations hotspots, including S5932F of nsp14-exonuclease, M5865V of nsp13 helicase  
194 L3606F of nsp6 transmembrane domain and T265I of nsp2 found with 17.02%, 16.56%,  
195 14.38% and 10.66% of the total genomes, respectively. For the four other hotspot mutations  
196 were distributed in ORF3a (Q57H and G251V) and nucleocapsid phosphoprotein (R203K  
197 and G204R).

### 198 **Geographical distribution and origin of mutations worldwide**

199 3067 genomes were dispersed in different countries with different genotype profiles. We  
200 performed a geo-referencing mutation analysis to identify region-specific loci.  
201 Remarkably, China and USA were the countries with the highest number of mutations 301  
202 and 296 (38,19 % and 37,56 % of the total number of mutations) including 140 (17,76%)  
203 and 229 (29%) singleton mutations specific to China and USA genomes respectively,  
204 followed by Malaysia and France with 3,6% and 2,4%, respectively.

205 It is interesting to note that among the 55 countries, 21 harbored singleton mutations.  
206 **(Additional file 3: Table S4)** illustrates the detailed singleton mutations found in these  
207 countries. The majority of the genomes analyzed carried more than one mutation.  
208 However, among the recurrent non-synonymous, synonymous, deletion and intergenic  
209 mutations, we found G251V (in ORF3a), and S5932F (in ORF1ab) present on all  
210 continents except Africa (**Fig 3**). While F924F, L4715L (in orf1ab), D614G (in spike)  
211 appeared in all strains except those from Asia. In Algeria, the genomes harbored mutations  
212 very similar to those in Europe, including two recurrent mutations T265I and Q57H of the  
213 ORF3a. Likewise, the European and Dutch genomes also shared ten recurrent  
214 mutations. On the other hand, continent-specific mutations have also been observed, for

215 example in America, we found seven mutations shared in almost all genomes. Besides, two  
216 mutations at positions 28117 and 28144 were shared by the Asian genomes, while four  
217 different positions 1059, 14408, 23403, 25563 and 1397, 11083, 28674, 29742 were shared  
218 by African and Australian genomes (Supplementary material). The majority of these  
219 mutations are considered to be transition mutations with a high ratio of A substituted by G.  
220 The genome variability was more visible in China and USA than in the rest of the world.  
221 SARS-CoV-2 genomes also harbored three co-occurrent mutations R203K, R203R and  
222 G204R in the N protein and were present in all continents except Africa and Asia (besides  
223 Taiwan).

#### 224 **Evolution of mutations over time**

225 We selected the genomes of the SARS-CoV-2 virus during the first three months after the  
226 emergence of this virus (December 24 to March 25). We have noticed that the mutations  
227 have accumulated at a relatively constant rate (**Fig 4**). The strains selected at the end of  
228 March showed a slight increase in the accumulation of mutations with an average of 11.34  
229 mutations per genome, compared to the genomes of February, December and January with  
230 an average number of mutations of 9.26, 10.59 and 10.34 respectively. The linear curve in  
231 Figure 5 suggests a continuous accumulation of SNPs in the SARS-CoV-2 genomes in the  
232 coming months. This pointed out that many countries had multiple entries for this virus  
233 that could be claimed. Thus in the deduced network demonstrated transmission routes in  
234 different countries.

235 The study of mutations accumulation over time showed a higher number of mutations in  
236 the middle of the outbreak (end of January). At the same time, an increase in the number  
237 of mutations in early April was also observed. The first mutations to appear were mainly  
238 located in the intergenic region linked to the nucleocapsid phosphoprotein and the orf8  
239 protein. The T265I, D614G and L84S hotspot mutations located in orf1ab and Spike  
240 proteins respectively were introduced into the virus for the first time in late February.

#### 241 **Phylogeographical analysis of SARS-CoV-2 genomes**

242 The phylogenetic tree based on the whole genome alignment demonstrates that SARS-  
243 CoV-2 is widely disseminated across distinct geographical location. The results showed  
244 that several strains are closely related even though they belong to different countries.



245 Which indicate likely transfer events and identify routes for geographical dissemination.  
246 For phylogenetic tree (<http://genoma.ma/covid-19/>) showed multiple introduction dates of  
247 the virus inside the USA with the first haplotype introduced related to the second epidemic  
248 wave in China.

249 Using correlation analysis between most recurrent mutations and countries distribution  
250 (**Fig 5**). We observed that most recurrent mutations clusters could be divided into four  
251 groups; the bigger cluster comprised nine mutations from the ten hotspots, while the  
252 first cluster harbored only the orf1ab mutation L3606F.

253 Meanwhile, geo clustering by geographic location showed two distinct clusters (**Fig 5**),  
254 cluster A grouping countries from Europe with those from America and Africa. However,  
255 Asia was only represented by Saudi Arabia. Cluster B in the other hand contained the  
256 majority of countries from the Asian and Australian continents. it is also harboring a sub-  
257 cluster containing the UK, USA, and Ireland which was previously demonstrated to contain  
258 a high number of mutations.

259 On the other hand, mutations as V378I and L3606F (in orf1ab), 29742 C>T (intergenic),  
260 L139L in (in nucleocapsid) were mainly correlated with Pakistan, Norway, Georgia,  
261 Taiwan, Kuwait, Australia, and Turkey while (S2839S, F3071Y and T4847I ), D128D and  
262 G196V mutations in orf1ab, nucleocapsid, ORF3a , respectively, were mainly present in  
263 Spain, Chile, and Greece. However, cluster harboring D614G (in spike), F924F (in orf1ab),  
264 and L4715L (in orf1ab) mutations, showed no correlation and were scatted through  
265 all countries especially those from Europe. A high correlation with a specific mutation was  
266 observed within Portugal, Saudi Arabia, Slovakia, Iceland, UK, USA, Colombia, Ecuador,  
267 Vietnam, Japan genomes.

### 268 **Selective pressure analysis**

269 Selective pressure on orf1ab, gene harbored a high rate of mutations and on the Spike gene,  
270 indicated a single alignment-wide  $\omega$  ratio of 0.571391 and 0.75951 for spike and or1ab,  
271 respectively. Most sites for both genes had  $\omega < 1$  values, indicating purifying selection. In  
272 orf1ab, we estimated eight sites under negative selection pressure (696, 1171, 2923, 3003,  
273 3715, 5221, 5704 and 6267) and three sites under positive selection pressure (1473, 2244  
274 and 3090). For spike, we found seven sites under negative selection pressure (215, 474,

275 541, 809, 820, 921 and 1044), and only one site under negative selection pressure (**Table**  
276 **1**).

277 The modelling results of orflab showed that the sites with positive selections were  
278 distributed in nsp3 and nsp4, while the negatively selected codons were located in nsp3,  
279 nsp4, nsp6, nsp12, nsp13, nsp14 and nsp16 (**Fig 6**). In spike, the only negatively selected  
280 residue was observed in the RBD region (**Fig 7**).

### 281 **Inter and intra-specific pan-genome analysis**

282 In order to highlight the structural proteins shared at the inter-specific scale between the  
283 isolates of the genus *Betacoronavirus*, thus at the intra-genomic scale of SARS-CoV-2, we  
284 have constructed a pan-genome by clustering the sets of proteins encoded in 115 genomes  
285 available publicly in NCBI (update: 20-03-2020), including 83 genomes of SARS-Cov-2  
286 and the rest distributed to other species of the same genus. Overall, a total of 1,190 proteins  
287 were grouped into a pangenome of 94 orthologous cluster proteins (**Additional file 2:**  
288 **Table S3**), of which ten proteins cluster were shared between SARS-CoV-2 and only three  
289 species of the genus *Betacoronavirus* (BatCoV RaTG13, SARS-CoV and Bat Hp-  
290 betacoronavirus/ Zhejiang2013). Of these, BatCoV RaTG13 had more orthologous  
291 proteins shared with SARS-CoV-2, followed by SARS-CoV with ten and nine orthologous  
292 proteins, respectively (**Fig 8A**). It is interesting to note that among all the strains used of  
293 *Betacoronavirus*, the ORF8 protein was found in orthology only between SARS-RATG13  
294 and SARS-CoV-2. In addition, the ORF10 protein was found as a singleton for SARS-  
295 CoV-2.

296 On the other hand, the analysis of the pangenome at the intra-genomic scale of 83 isolates  
297 of SARS-CoV-2 (**Fig 8B**), showed that ORF7b and ORF10 were two accessory proteins  
298 (proteins variable) in SARS-CoV- 2 genomes, while the other proteins belonged to the core  
299 proteins of SARS-CoV-2 (conserved in all genomes).

### 300 **Discussion**

301 The rate of mutations results in viral evolution and variability in the genome, thus allowing  
302 viruses to escape host immunity, as well as drugs (20). Initial published data suggests that  
303 SARS-CoV-2 is genetically stable (21) which may increase the effectiveness of vaccines  
304 under development. The study on the genomic variation of SARS- CoV- 2 is very

305 important for the investigation of pathogenesis, disease course, prevention, and treatment  
306 of SARS- CoV- 2 infection. In this study, we characterized the genetic variations in a large  
307 population of SARS-CoV-2 genomes. Our results showed a diversity of mutations detected  
308 with different frequencies. Overall, more than 500 non-synonymous mutations in SARS-  
309 CoV-2 genomes have been identified. The orf1ab gene having more than half the size of  
310 the SARS-CoV-2 genome and is divided into 16 nsp (nsp1-nsp16) (22). We found more  
311 than half of recurrent mutations in orf1ab, and a high mutation rate in nsp3, nsp12 and  
312 nsp2, with 124, 57 and 46, respectively. Nsp2 and nsp3 were both essential for correcting  
313 viral replication errors (23). Thus, recent studies have suggested that mutations falling in  
314 the endosome - associated - protein - like domain of the nsp2, could explain why this virus  
315 is more contagious than SARS (24).

316 The replication enzymes nsp12 to nsp16 have been reported as antiviral targets for SARS-  
317 CoV (25). In the SARS-CoV-2 genomes, we found that nsp12 to nsp15 harbored nine  
318 recurrent non-synonymous mutations. Among them, eight identified as new mutations,  
319 including three in nsp12-RNA-dependent RNA polymerase (M4555T, T4847I and  
320 T5020I), three in nsp13-Helicase (V5661A, P5703L and M5865V) and two in nsp15-  
321 EndoRNase (I6525T and Ter6668W). However, these new mutations must be taken into  
322 account when developing a vaccine using the orf1ab protein sequences as a therapeutic  
323 target.

324 A high number of mutations were identified in the spike protein, an important determinant  
325 in pathogenicity that allows the virion attachment to the cell membrane by interacting with  
326 the host ACE2 receptor Angiotensin-converting enzyme 2) (26). Among all the frequent  
327 mutations in this protein, the V483A mutation has been identified in this receptor and found  
328 mainly in SARS-CoV-2 genomes isolated from USA. This result is consistent with the  
329 study of Junxian et al. (27). Eight stains from china, USA and France harbored V367F  
330 mutation previously described to enhance the affinity with ACE2 receptor (27).

331 Interestingly, ten hyper variable genomic hotspots with high frequencies of mutated allele  
332 detected. Among them, position 11083 (L3606F) detected in NSP6, this protein works with  
333 nsp3 and nsp4 by forming double-membrane vesicles and convoluted membranes involved  
334 in viral replication (28). Besides, three positions were previously reported by Pachetti et

335 al. (2020), of which the two positions 17858 (M5865V) and 18060 (S5932F) in ORF1ab,  
336 and 28881 (R203K) in nucleocapside. Moreover, intraspecies pangenome analysis of  
337 SARS- CoV-2 showed that the six of the genes harboring hotspot mutations belong to the  
338 core genome.

339 Thus, under normal circumstances genomic variation increase the viruses spread and  
340 pathogenicity. This happens when the virus accumulated mutation enabling its virulence  
341 potential (29). Genomic comparison of the studied population allowed us to gain insights  
342 into virus mutations occurrence over time and within different geographic areas. In the  
343 SARS-CoV virus, the SNP distribution is not random, and it is more dominant in critical  
344 genes for the virus (20,30). Our results confirmed what was previously described and  
345 elucidate the presence of numerous hotspot mutations. Besides, co-occurrence mutations  
346 were also common in different countries all along with singleton mutations. In the case of  
347 the China, the singleton mutations are driven by the single group that diverged differently  
348 due to the environment, the host, and the number of generations. These mutations are due  
349 to the low fidelity of reverse transcriptase (29, 31).

350 China, US, France and Malaysia contain a high number of specific mutations which may  
351 be the cause of a rapid transmission, especially in the US. These specific mutations may  
352 also be correlated with the critical condition in US and France.

353 The clustering of these genomes revealed the spread of clades to diverse geographical  
354 regions. We observed an increase of mutations over time following the first dissemination  
355 event from China. Specific haplotypes were also predominant to a geographical location,  
356 especially in the China. This study opens up new perspectives to determine whether one of  
357 these frequent mutations will lead to biological differences and their correlation with  
358 different mortality rates.

359 Among the seven nsp of or1ab hosting sites under selective pressure, only nsp3 and nsp4  
360 contains both residues under positive and negative selection. The modelling of nsp3  
361 domains shows that only the negative selection site 1171 (Thr- 353), was located at the  
362 conserved macro domain Mac1 (previously X or ADP-ribose 1" phosphatase) (32). This  
363 domain has been previously shown to be dispensable for RNA replication in the context of  
364 a SARS-CoV replicon (33). However, it could counteract the host's innate immune  
365 response (34). It was proposed that the 3Ecto luminal domain of nsp3 interacts with the

366 large luminal domain of nsp4 (residues 112-164) to induce discrete membrane formations  
367 as an important step in the generation of ER viral replication organelles (35, 36). As we  
368 have shown previously by the FEL, MEME and FUBAR methods, the orf1ab 2244 site  
369 coding for ILE-1426 is under positive selection pressure and since it is located on the  
370 luminal 3ecto domain of the nsp3 protein, this can be explained by a possible host influence  
371 on the virus in this domain. The results of selective pressure analysis revealed the presence  
372 of several negatively selected residues, one of which is located at the receptor-binding  
373 domain (GLN-474) and which is known by its interaction with the GLN24 residue of the  
374 human ACE2 (Angiotensin-converting enzyme 2) receptor (37). In general, it is well-  
375 known that negatively selected sites could indicate a functional constraint and could be  
376 useful for drug or vaccine target design, given their conserved nature and therefore less  
377 likely to change (38).

### 378 **Conclusion**

379 The SARS-CoV-2 pandemic has caused a very large impact on health and economy  
380 worldwide. Therefore, understanding genetic diversity and virus evolution become a  
381 priority in the fight against the disease. Our results show several molecular facets of the  
382 relevance of this virus. We have shown that recurrent mutations are distributed mainly in  
383 six SARS-CoV-2 genes with variable mutated allele frequencies. We were able to highlight  
384 an increase in mutations accumulation overtime and revealed the existence of three major  
385 clades in various geographic regions. Finally, the study allowed us to identify specific  
386 haplotypes by geographic location and provides a list of sites under selective pressure that  
387 could serve as an interesting avenue for future studies.

388

389

390

391

392

393

394 **Conflict of interest**

395 The authors declare that they have no competing interests.

396 **Acknowledgments**

397 We sincerely thank the authors and laboratories around the world who have sequenced and  
398 shared the full genome data for SARS-CoV-2 in the GISAID database. All data authors  
399 can be contacted directly via [www.gisaid.org](http://www.gisaid.org).

400 This work was carried out under National Funding from the Moroccan Ministry of Higher  
401 Education and Scientific Research (PPR program) to AI. This work was also supported, by  
402 a grant to AI from Institute of Cancer Research of the foundation Lalla Salma.

403 **References**

404

405 1. World Health Organization. Infection prevention and control during health care  
406 when COVID-19 is suspected: interim guidance, 19 March 2020. World Health  
407 Organization. 2020. Available from:  
408 <https://apps.who.int/iris/handle/10665/331495>

409 2. **Enjuanes LD, Cavanagh K, Holmes MMC, Lai H, Laude P, Masters P et al.**  
410 (2000) Coronaviridae. In: Virus taxonomy. Classification and nomenclature  
411 of viruses (M. H. V. van Regenmortel, C. M. Fauquet, D. H. L. Bishop, E. B.  
412 Carstens, M. K. Estes, S. M. Lemon, J. Maniloff, M. A. Mayo, D. J. McGeoch,  
413 C. R. Pringle, and R. B. Wickner eds.) Academic Press, San Diego. pp 835-  
414 849.

415 3. Yeşilbağ K, Aytoğru G. Coronavirus host divergence and novel coronavirus  
416 (Sars-CoV-2) outbreak. Clinical and Experimental Ocular Trauma and  
417 Infection. 2020 Apr 23;2(1):1-9.

418 4. Andersen KG, Rambaut A, Lipkin WI, Holmes EC, Garry RF. The proximal  
419 origin of SARS-CoV-2. Nat Med. 2020;26: 450–452. DOI:10.1038/s41591-  
420 020-0820-9

421 5. Wu F, Zhao S, Yu B, Chen YM, Wang W, Song ZG, et al. A new coronavirus  
422 associated with human respiratory disease in China. Nature. 2020;579:265-269.

423 6. Tang X, Wu C, Li X, Song Y, Yao X, Wu X, et al. On the origin and continuing

- 424 evolution of SARS-CoV-2. *Natl Sci Rev.* 2020. DOI: 10.1093/nsr/nwaa036.
- 425 7. Li LQ, Huang T, Wang YQ, Wang ZP, Liang Y, Huang TB, et al. COVID-19  
426 patients' clinical characteristics, discharge rate, and fatality rate of meta-  
427 analysis. *J Med Virol.* 2020 Mar 12. Doi: 10.1002/jmv.25757.
- 428 8. Li H. Minimap2: pairwise alignment for nucleotide sequences. *Bioinformatics.*  
429 2018;34: 3094–3100 .DOI: 10.1093/bioinformatics/bty191.
- 430 9. Li H, Handsaker B, Wysoker A, Fennell T, Ruan J, Homer N, et al. The Sequence  
431 Alignment/Map format and SAMtools. *Bioinformatics.* 2009;25: 2078–9.  
432 DOI:10.1093/bioinformatics/btp352
- 433 10. Cingolani P, Platts A, Wang LL, Coon M, Nguyen T, Wang L, et al. A program  
434 for annotating and predicting the effects of single nucleotide polymorphisms,  
435 SnpEff: SNPs in the genome of *Drosophila melanogaster* strain w1118; iso-2;  
436 iso-3. *Fly (Austin).* 2012;6: 80-92 .DOI: 10.4161/fly.1969
- 437 11. Edgar RC. MUSCLE: multiple sequence alignment with high accuracy and  
438 high throughput. *Nucleic Acids Res.* 2004;32: 1792–1797. DOI:  
439 10.1093/nar/gkh340
- 440 12. MetsalunT, Vilo J. ClustVis: A web tool for visualizing clustering of  
441 multivariate data using Principal Component Analysis and heatmap. *Nucleic  
442 Acids Res.* 2015;43(W1):W566–W570. DOI: 10.1093/nar/gkv468.
- 443 13. Pond SL, Frost SD, Muse SV. HyPhy: hypothesis testing using phylogenies.  
444 *Bioinformatics.* 2005;21: 676–679. DOI: 10.1093/bioinformatics/bti079
- 445 14. Kumar S, Stecher G, Li M, Knyaz C, Tamura. MEGA X: Molecular  
446 Evolutionary Genetics Analysis across Computing Platforms. *Mol Biol Evol.*  
447 2018;35: 1547-1549. DOI: 10.1093/molbev/msy096.
- 448 15. Pond SL, Frost SD. Not so different after all: a comparison of methods for  
449 detecting amino-acid sites under selection. *Mol Biol Evol.* 2005;22: 1208-1222.  
450 Doi:10.1093/molbev/msi105.
- 451 16. Murrell B, Moola S, Mabona A, Weighill T, Sheward D, Pond SL, et al. Fubar:  
452 a fast, unconstrained Bayesian approximation for inferring selection. *Mol Biol  
453 Evol.* 2013;30: 1196-1205. DOI: 10.1093/molbev/mst030

- 454 17. Murrell B, Wertheim JO, Moola S, Weighill T, Scheffler K, Pond SL. Detecting  
455 Individual Sites Subject to Episodic Diversifying Selection. *PLoS Genet.*  
456 2012;8: e1002764. Doi: 10.1371/journal.pgen.1002764
- 457 18. Jordan IK, Rogozin IB, Wolf YI, Koonin EV. Essential genes are more  
458 evolutionarily conserved than are nonessential genes in bacteria. *Genome Res.*  
459 2002;12:962–968.
- 460 19. Lechner M, Findeiß S, Steiner L, Marz M, Stadler PF, Prohaska SJ.  
461 Proteinortho: detection of (Co-)orthologs in large-scale analysis. *BMC*  
462 *Bioinformatics.* 2011;12:1–9. DOI:10.1186/1471-2105-12-124.
- 463 20. Pachetti M, Marini B, Benedetti F, Giudici F, Mauro E, Storici P, et al.  
464 Emerging SARS-CoV-2 Mutation Hot Spots Include a Novel RNA-dependent-  
465 RNA Polymerase Variant. *J Transl Med.* 2020;18: 179. DOI: 10.1186/s12967-  
466 020-02344-6.
- 467 21. Su Y, Anderson D, Young B, Zhu F, Linster M, Kalimuddin S, et al. Discovery  
468 of a 382-nt deletion during the early evolution of SARS-CoV-2. *BioRxiv*  
469 [Preprint]. 2020 [cited 2020 March 25]. Available from:  
470 <https://www.biorxiv.org/content/10.1101/2020.03.11.987222v1>
- 471 22. Khailany RA, Safdar M, Ozaslan M. Genomic characterization of a novel  
472 SARS-CoV-2. *Gene Rep.* 2020;19:100682.  
473 DOI:10.1016/j.genrep.2020.100682
- 474 23. Harcourt BH, Jukneliene D, Kanjanahaluethai A, Bechill J, Severson KM,  
475 Smith CM, et al. Identification of severe acute respiratory syndrome  
476 coronavirus replicase products and characterization of papain-like protease  
477 activity. *J Virol.* 2004;78:13600-13612. DOI:10.1128/JVI.78.24.13600-  
478 13612.2004
- 479 24. Angeletti S, Benvenuto D, Bianchi M, Giovanetti M, Pascarella S, Ciccozzi  
480 M. . COVID 2019: the role of the nsp2 and nsp3 in its pathogenesis. *Journal*  
481 *of Medical Virology,* 2020;92:584-588.
- 482 25. Subissi L, Imbert I, Ferron F, Collet A, Coutard B, Decroly E, et al. SARS-  
483 CoV ORF1b-encoded nonstructural proteins 12-16: replicative enzymes as



- 484                   antiviral        targets.        Antiviral        Res.        2014;101:122-30.        DOI:  
485                   10.1016/j.antiviral.2013.11.006.
- 486                   26. Hoffmann, Markus, et al. SARS-CoV-2 cell entry depends on ACE2 and  
487                   TMPRSS2 and is blocked by a clinically proven protease inhibitor.*Cell* (2020).
- 488                   27. Ou J, Zhou Z, Dai R, Zhang J, Lan W, Zhao S. Emergence of RBD mutations  
489                   from circulating SARS-CoV-2 strains with enhanced structural stability and  
490                   higher human ACE2 receptor affinity of the spike protein. bioRxiv  
491                   2020.03.15.991844; doi: <https://doi.org/10.1101/2020.03.15.991844>
- 492                   28. Angelini MM, Akhlaghpour M, Neuman BW, Buchmeier MJ. Severe acute  
493                   respiratory syndrome coronavirus nonstructural proteins 3, 4, and 6 induce  
494                   double-membrane vesicles. *mBio*. 2013 Aug 13. pii: e00524-13. DOI:  
495                   10.1128/mBio.00524-13.
- 496                   29. Stern A, Yeh MT, Zinger T, et al. The Evolutionary Pathway to Virulence of  
497                   an RNA Virus. *Cell*. 2017;169(1):35-46.e19. doi:10.1016/j.cell.2017.03.013.
- 498                   30. Wen F, Yu H, Guo J, Li Y, Luo K, Huang S. Identification of the hyper-variable  
499                   genomic hotspot for the novel coronavirus SARS-CoV-2. *J Infect*. 2020. pii:  
500                   S0163-4453(20)30108-0. DOI: 10.1016/j.jinf.2020.02.027.
- 501                   31. Denison MR, Graham RL, Donaldson EF, Eckerle LD, Baric RS.  
502                   Coronaviruses: an RNA proofreading machine regulates replication fidelity and  
503                   diversity. *RNA Biol*. 2011;8: 270–279. DOI: 10.4161/rna.8.2.15013.
- 504                   32. Neuman BW. Bioinformatics and functional analyses of coronavirus  
505                   nonstructural proteins involved in the formation of replicative organelles.  
506                   *Antiviral Res*. 2016;135: 97-107. DOI: 10.1016/j.antiviral.2016.10.005.
- 507                   33. Kusov Y, Tan J, Enrique A, Luis E, Hilgenfeld R. A G-quadruplex-binding  
508                   macrodomain within the “SARS-unique domain” is essential for the activity of  
509                   the SARS-coronavirus replication-transcription complex. *Virology*. 2015;484:  
510                   313–322. DOI: 10.1016/j.virol.2015.06.016.
- 511                   34. Fehr AR, Channappanavar R, Jankevicius G, Fett C, Zhao J, Athmer J. The  
512                   Conserved Coronavirus Macrodomain Promotes Virulence and Suppresses the  
513                   Innate Immune Response during Severe Acute Respiratory Syndrome

- 514                   Coronavirus Infection. *mBio*. 2016 Dec 13. pii: e01721-16. DOI:  
515                   10.1128/mBio.01721-16.
- 516                   35. Hagemeijer MC, Monastyrska I, Griffith J, van der Sluijs P, Voortman J, en  
517                   Henegouwen PM, et al. Membrane rearrangements mediated by coronavirus  
518                   nonstructural proteins 3 and 4. *Virology*. 2014;458: 125-135. DOI:  
519                   10.1016/j.virol.2014.04.027.
- 520                   36. Qiu Y, Xu K. Functional studies of the coronavirus nonstructural proteins.  
521                   *STEMedicine*. 2020;1:e39. DOI: 10.37175/stemedicine.v1i2.39.
- 522                   37. Yan R, Zhang Y, Li Y, Xia L, Guo Y, Zhou Q. Structural basis for the  
523                   recognition of SARS-CoV-2 by full-length human ACE2. *Science*.  
524                   2020;367:1444-1448. DOI: 10.1126/science.abb2762.
- 525                   38. Mazumder R, Hu ZZ, Vinayaka CR, Sagripanti JL, Frost SD, Pond SL, et al.  
526                   Computational analysis and identification of amino acid sites in dengue E  
527                   proteins relevant to development of diagnostics and vaccines. *Virus Genes*.  
528                   2007;35:175-186. DOI: 10.1007/s11262-007-0103-2.
- 529                   39. Stamatakis A. RAxML version 8: a tool for phylogenetic analysis and post-  
530                   analysis of large phylogenies. *Bioinformatics*. 2014;30: 1312–1313. Doi:  
531                   10.1093/bioinformatics/btu033.

532  
533  
534  
535  
536  
537  
538  
539  
540  
541  
542  
543  
544

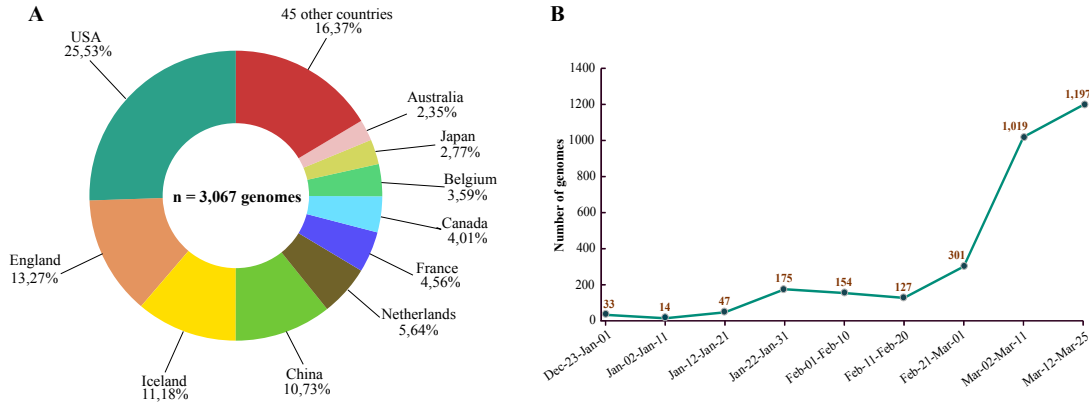

545

546

547 **Figure 1 : Distribution of the genomes of the 3,067 genomes used in this study by**  
 548 **county and date of isolation.** A) The pie chart represents the percentage of genomes used  
 549 in this study according to their geographic origins. The colors indicate different countries.  
 550 B) Number of genomes of complete pathogens, distributed over a period of 3 months from  
 551 the end of December to the end of March

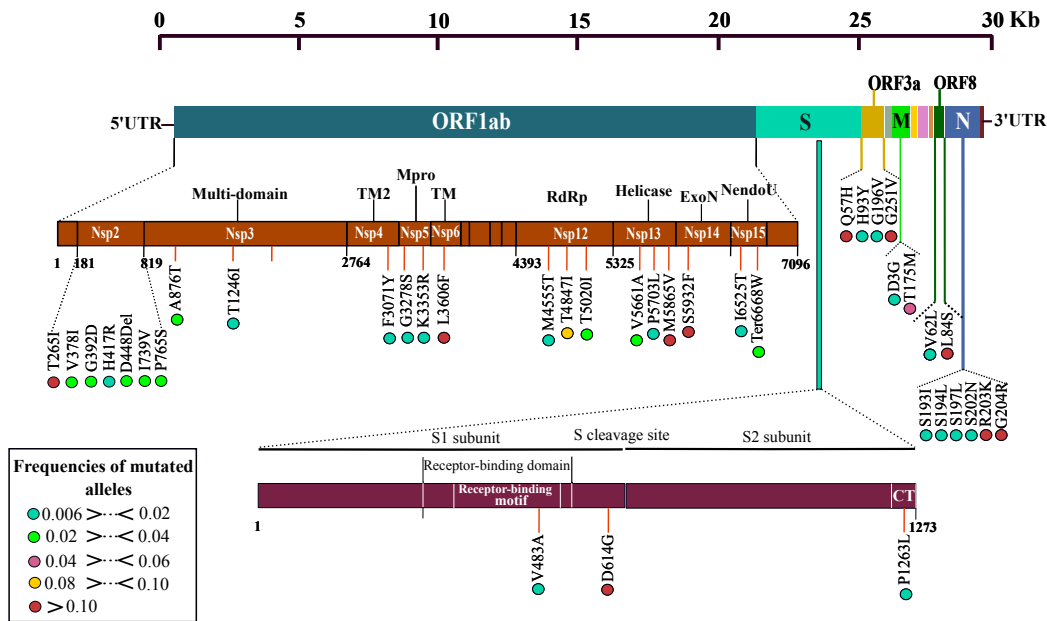

552

553 **Figure 2 : Schematic representation of the SARS-CoV-2 genome with recurrent non-**  
 554 **synonymous mutations.** The brown and garnet diagrams illustrate the non-structural  
 555 proteins (nsp1 to nsp 16) of the ORF1ab protein and the two subunits of the spike (S)  
 556 protein, respectively. Recurrent mutations represented by vertical lines. The frequency of  
 557 each mutation in the population is presented by color coded circles.  
 558

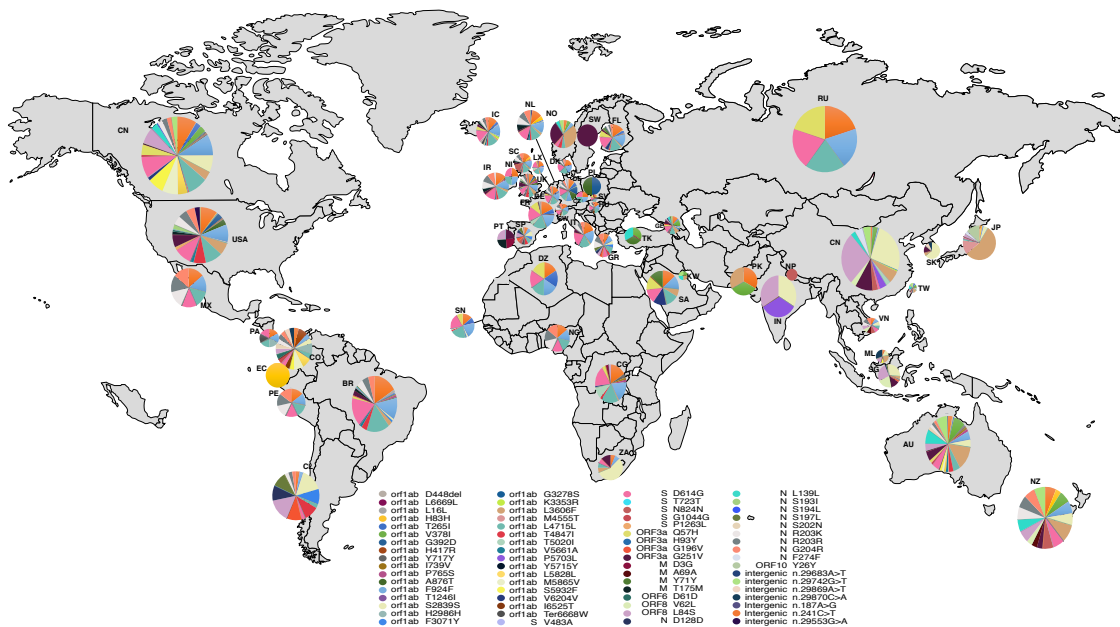

559

560 **Figure 3 : Map showing Geographical distribution of hotspot mutation in the studied**  
 561 **population worldwide.** The pie charts show the relative frequencies of haplotype for each  
 562 population. The haplotypes are color coded as shown in the key. The double-digit represent  
 563 countries' two letters code. The circle's size was randomly generated with no association  
 564 with the number of genomes in each country.

565

566

567

568

569

570

571

572

573

574

575

576

577

578

579

580

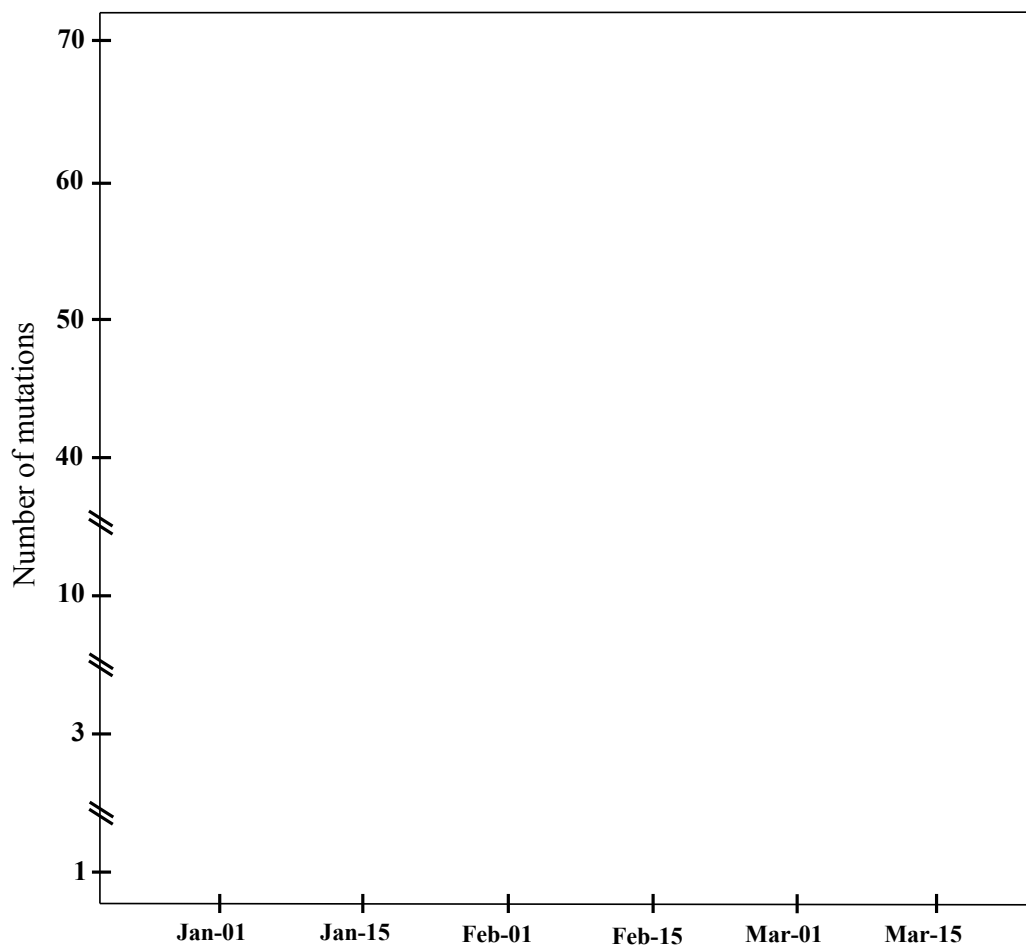

581

582

583

584

585

586

587

588

589

590

591

592

593

594

**Figure 4 : The graph represents substitutions accumulation in a three months period.** The accumulation of mutations increases linearly with time. The dots represent the number of mutations in a single genome. All substitutions were included non-synonymous, synonymous, intergenic.



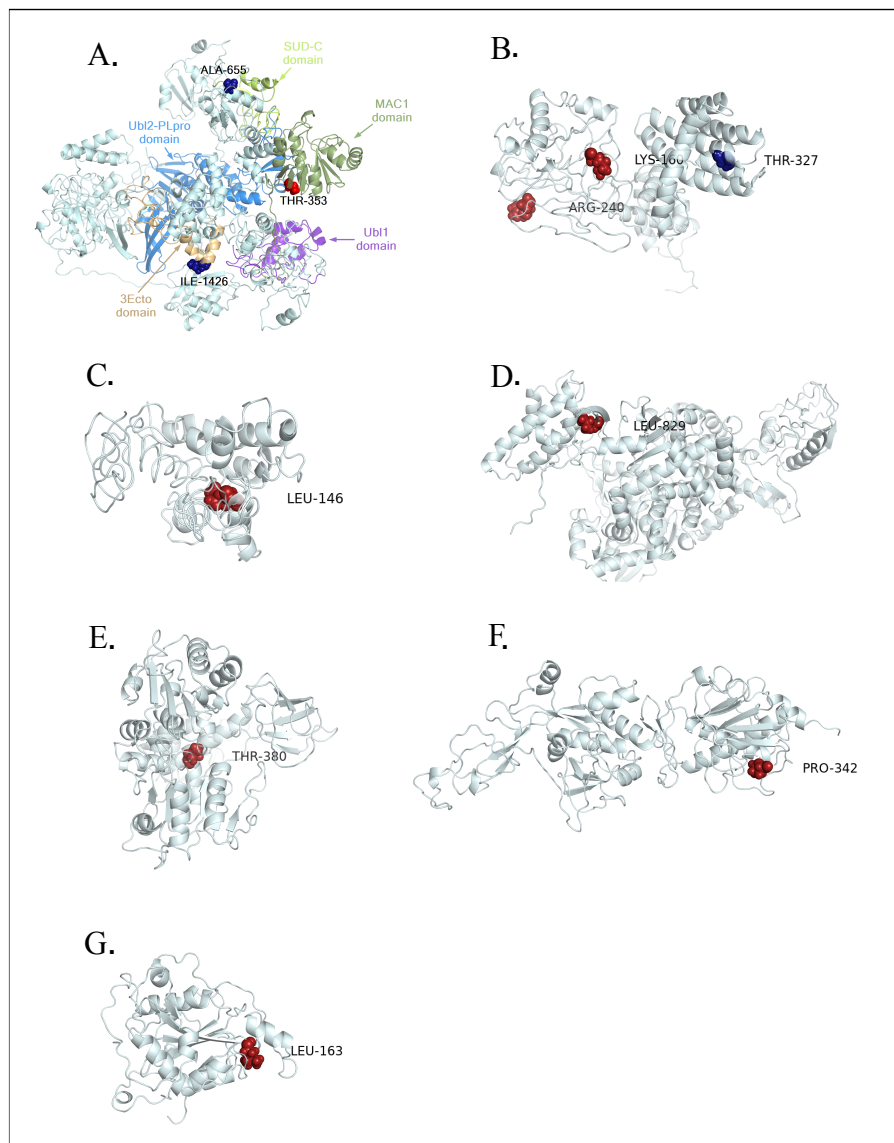

612

613 **Figure 6 : Structural view of selective pressure in orf1ab gene.** The residue under the  
614 positive and negative selection is highlighted in blue and red respectively. The modeling  
615 of orf1ab non-structural proteins (NSP3, NSP4, NSP6, NSP12, NSP13, NSP14, and  
616 NSP16) harboring residues under pressure selection was produced using CI-TASSER. A.  
617 The NSP3 domains MAC1, Ubl1, Ubl2-PLpro, and SUD-C are color-coded in the 3D  
618 representation. The residues Ile-1426 and Ala-655 under negative selection are located  
619 respectively on 3Ecto and SUD-C domains while Thr-353 residue under positive selection  
620 is shown on the MAC1 domain, B. 3D representation of the NSP4 protein, C. 3D  
621 representation of the NSP6 protein, D. 3D representation of the NSP12 protein, E. 3D  
622 representation of the NSP13 protein, F. 3D representation of the NSP14 protein, G. 3D  
623 representation of the NSP16 protein.

624

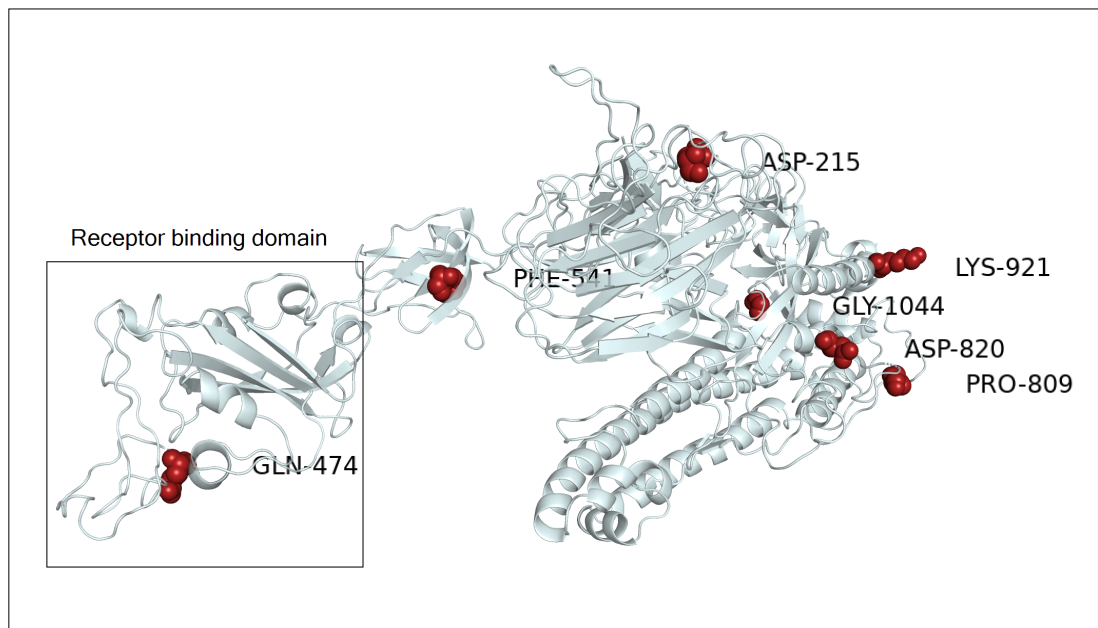

625  
626 **Figure 7 : Structural view of selective pressure in spike gene.** The negatively selected  
627 site in spike protein is highlighted in red. The only amino acid residue selected negatively  
628 on the receptor-binding domain corresponds to GLN-474. The cryo-EM structure with  
629 PDB id 6VSB was used as a model for the gene S in its prefusion conformation.

630  
631  
632  
633  
634  
635  
636  
637  
638  
639  
640  
641  
642  
643  
644  
645  
646  
647  
648  
649



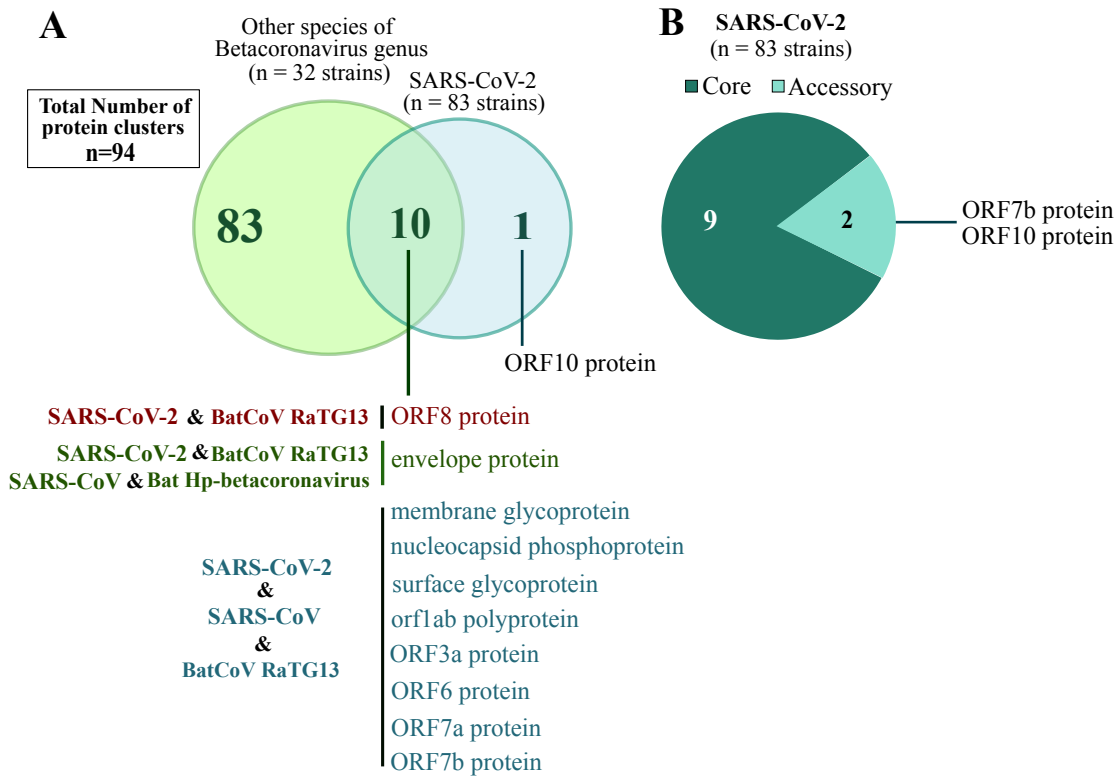

650  
651  
652  
653  
654  
655  
656  
657  
658  
659  
660  
661  
662  
663  
664  
665  
666  
667  
668  
669  
670  
671  
672  
673  
674

**Figure 8 : Pangenome analysis of 32 from different Betacoronavirus species and 83 of SARS-CoV-2.** (A) The Venn diagram represents the number of core, accessory, and unique proteins inside the Betacoronavirus genus. (B) The pie chart illustrates the core and accessory protein inside the SARS-CoV-2 specie.

675 **Table 1 : Selective pressure analysis on the spike and orflab genes of SARS-CoV-2**

| Genes  | $\omega$ | FEL method |                                                       | MEME method | SLAC method |    | FUBAR method            |                       |
|--------|----------|------------|-------------------------------------------------------|-------------|-------------|----|-------------------------|-----------------------|
|        |          | PS         | NS                                                    | PS          | PS          | NS | PS                      | NS                    |
| Spike  | 0.571391 | -          | Codons 215, 474, 809, 820, 921,                       | -           | -           | -  | Codon 5                 | Codons 215, 474, 541, |
|        |          |            |                                                       |             |             |    |                         |                       |
| orflab | 0.75951  | Codon 2244 | Codons 1171, 2923, 3003, 3715, 5221, 5704, 6267, 6961 | Codon2244   | -           | -  | Codons 1473, 2244, 3090 | -                     |
|        |          |            |                                                       |             |             |    |                         |                       |

676

677
